# Supplementary material
Source: publisher site journal article supplement (https://www.dovepress.com/article/250233)
Supplement: Supplementary file 1 [file get_supplementary_file.php]

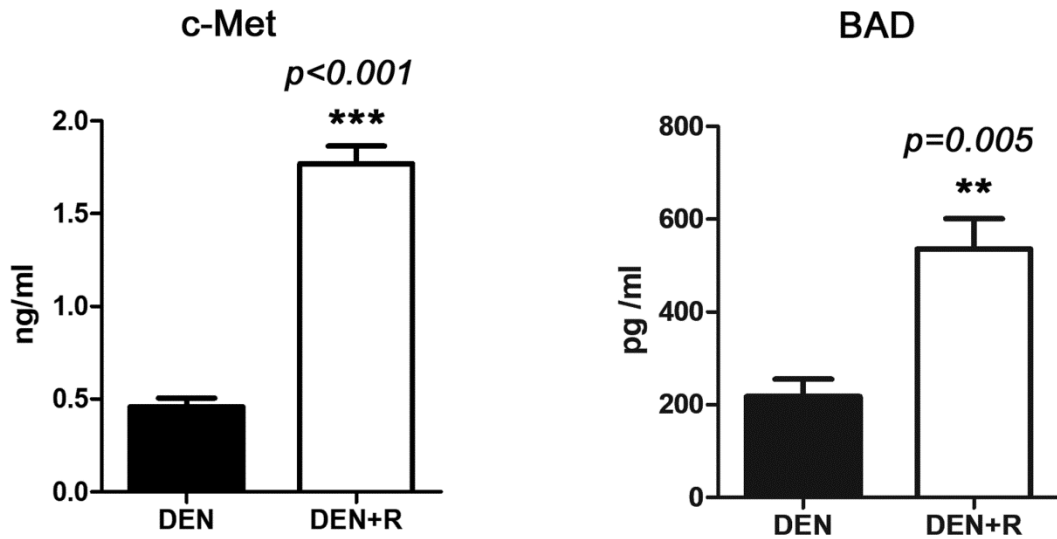

**Figure S1**

Serum ELISA analysis of c-met and BAD. Romidepsin-treated mice have significantly increased levels of both c-Met and BAD by comparison with untreated controls. Numbers on the y-axis of bar graphs correspond to the mean  $\pm$  SEM of the parameters assessed. \*p < 0.05, \*\* p < 0.001. BAD: Bcl2-associated agonist of cell death; c-Met: met proto-oncogene; DEN: diethylnitrosamine; R: Romidepsin

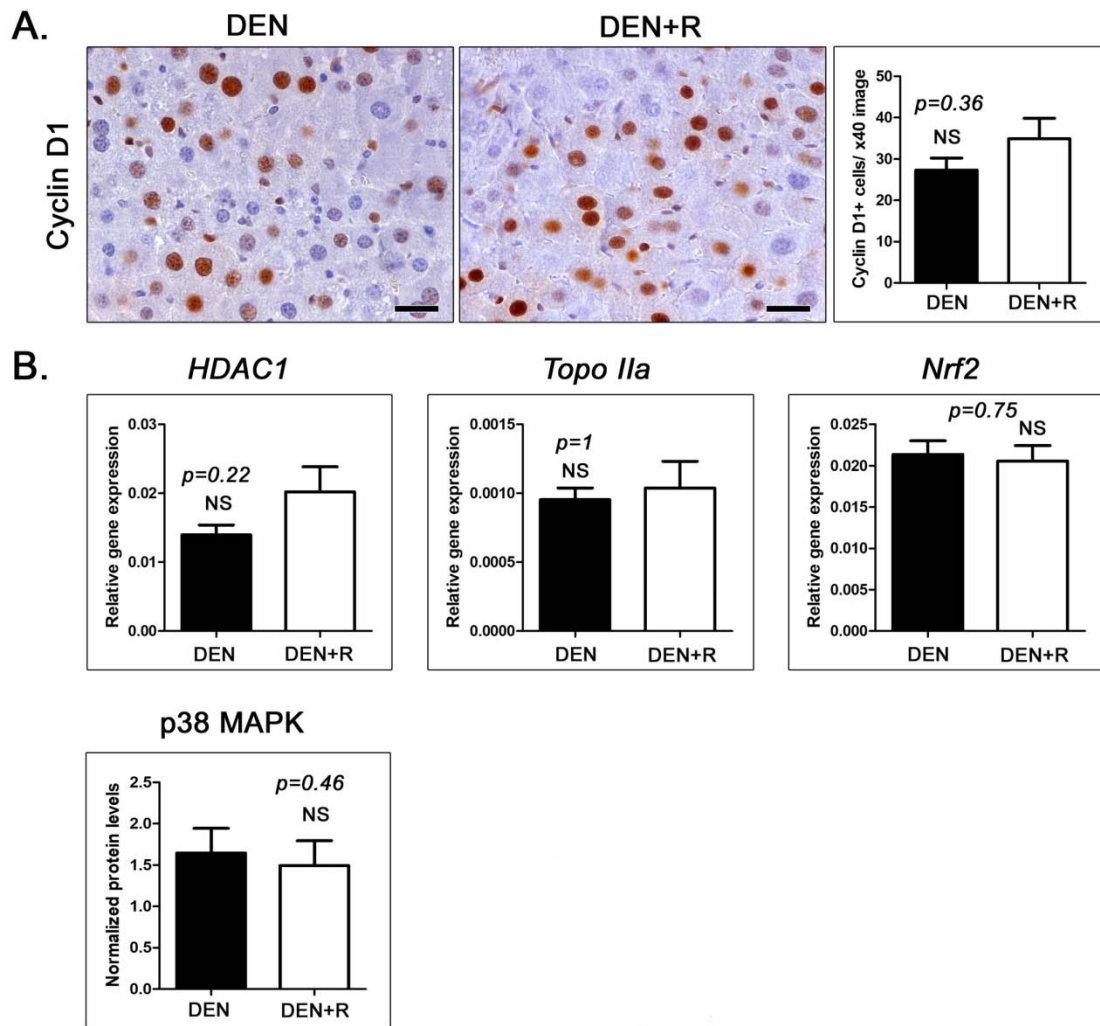

**Figure S2**

A. HDAC1/2 depletion did not affected numbers of neoplastic liver cells showing positive nuclear Cyclin D1 immunohistochemical signal. B. Likewise, it did not alter the expression of *HDAC1*, *Topo IIa*, *Nrf2* and p38 MAPK. IHC; Diaminobenzidine chromogen, Hematoxylin counterstain. Scale bars: 25  $\mu$ m. Numbers on the y-axis of bar graphs correspond to the mean  $\pm$  SEM of the parameters assessed. NS  $p > 0.05$ . DEN: diethylnitrosamine; HDAC1: histone deacetylase 1; Nrf2: nuclear factor, erythroid derived 2, like 2; p38 MAPK: mitogen-activated protein kinase 14; R: Romidepsin; Topo IIa: topoisomerase (DNA) II alpha

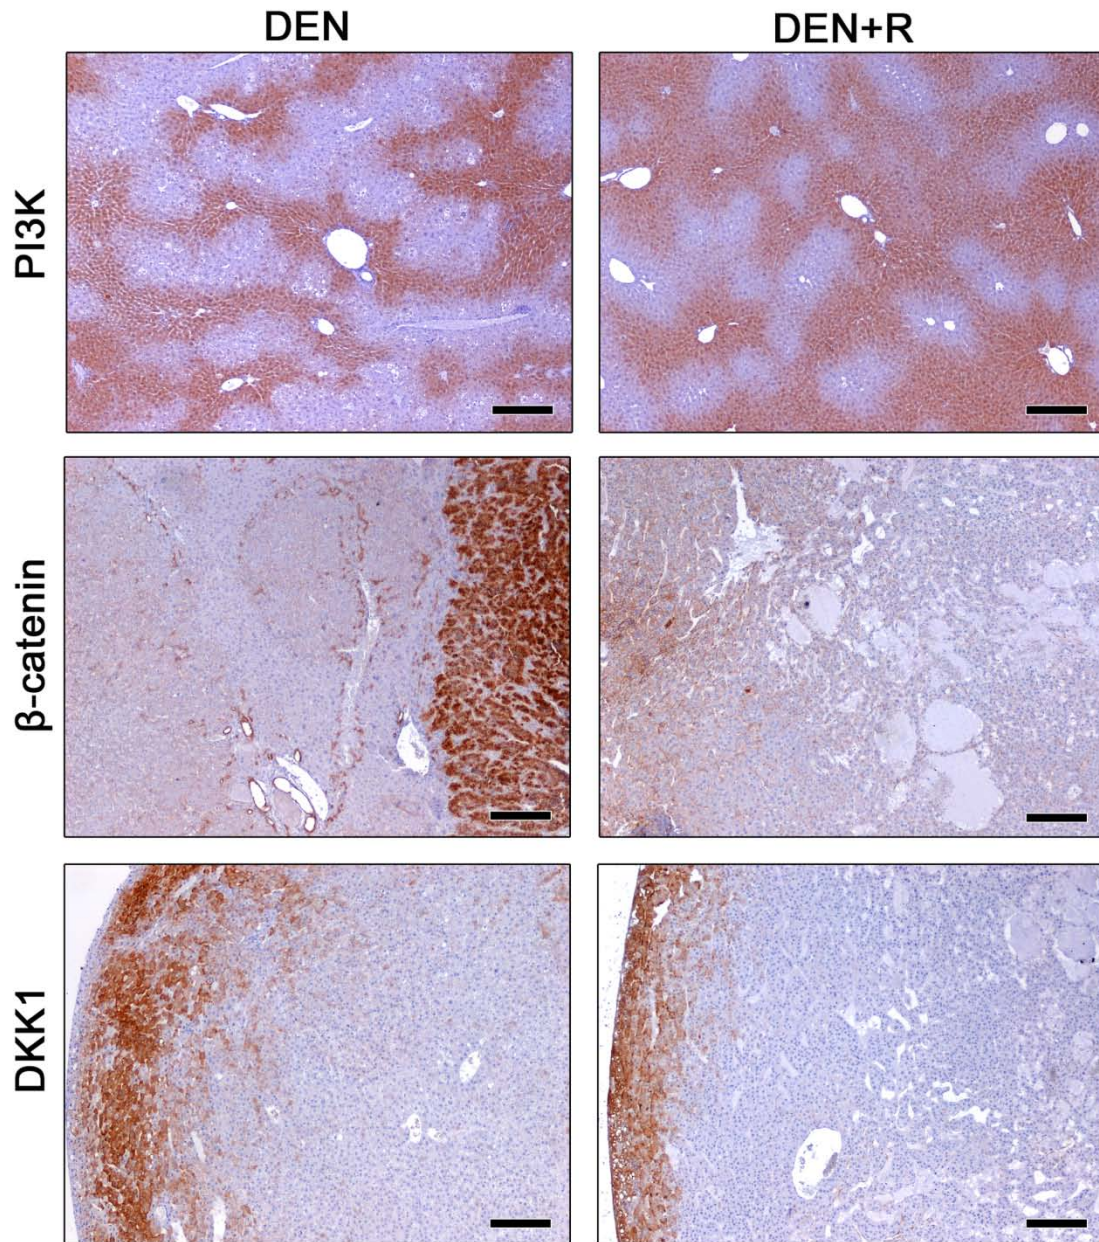

**Figure S3**

Romidepsin treatment affected neither the presence nor the topographical distribution of PI3K expression in the non-tumoral liver of mice. Poorly differentiated areas in advanced HCC lesions show scarce  $\beta$ -catenin expression. In large HCC tumors DKK1-positivity is seen mostly at the margins and invasive fronts of tumors. IHC; Diaminobenzidine chromogen, Hematoxylin counterstain. Scale bars: 250  $\mu$ m. DEN:

diethylnitrosamine; DKK1: dickkopf WNT signaling pathway inhibitor 1; PI3K:  
phosphoinositide-3-kinase regulatory subunit 1; R: Romidepsin
